# Supplementary material for: The Immune Landscape of Molecular Bacterial Vaginosis and HPV Natural History
Source: Research Square preprint supplement (doi:10.21203/rs.3.rs-613095/v1), 2021-06-22
Supplement: Supplementary file 1 [file 281ae767567a2f0b0109c6f2.pdf]

52 **Supplementary Materials**

|              |        | Amsel's Criteria |       |
|--------------|--------|------------------|-------|
|              |        | BV(+)            | BV(-) |
| Nugent Score | BV (+) | 18               | 8     |
|              | BV (-) | 1                | 22    |

53

54 **Supplemental Table 1. BV Diagnosis Agreement between Amsel and Nugent scores**

55 Data is shown for 49 women where a definitive BV diagnosis using Nugent Score could be  
 56 made. Not included are 8 cases diagnosed as indeterminate by Nugent of whom 3 were positive  
 57 and 5 were negative by Amsel's criteria.

58 **Supplemental Table 2.** Cytokines Identified to be Significantly Associated with *molBV*

| <u>Cytokine</u> | <u>Odds Ratio</u> | <u>Categorical trend p-val</u> | <u>Categorical trend q-val</u> | <u>Citing Literature</u>                                                                                                                                  | <u>Cytokine Description</u>                                           |
|-----------------|-------------------|--------------------------------|--------------------------------|-----------------------------------------------------------------------------------------------------------------------------------------------------------|-----------------------------------------------------------------------|
| <b>IL-1B</b>    | 1.73 [1.56-1.92]  | 2.98E-22                       | 9.54E-21                       | Positive<br>Nonpregnant women <sup>1-9</sup><br>Pregnant <sup>10-14</sup><br>Pregnant black women <sup>15</sup><br>Undergoing IVF treatment <sup>16</sup> | Inflammation/cell proliferation, differentiation, apoptosis           |
| <b>IL-1A</b>    | 1.52 [1.36-1.69]  | 3.43E-13                       | 9.95E-12                       | Positive<br>Nonpregnant women <sup>8</sup><br>Pregnant <sup>17</sup><br>Twin pregnancies <sup>18</sup>                                                    | Acute phase protein/infection response                                |
| <b>SEGFR</b>    | 1.64 [1.48-1.81]  | 2.85E-19                       | 8.83E-18                       |                                                                                                                                                           | Cell migration/adhesion/proliferation/mutations of receptor in cancer |
| <b>STNFRI</b>   | 1.5 [1.34-1.68]   | 2.93E-12                       | 7.61E-11                       |                                                                                                                                                           | Inflammatory marker of chronic disease                                |
| <b>SIL-6R</b>   | 1.51 [1.35-1.68]  | 8.69E-13                       | 2.35E-11                       |                                                                                                                                                           | Trans-signaling of IL-6 via gp130                                     |
| <b>IL-15</b>    | 1.36 [1.22-1.52]  | 7.33E-08                       | 1.83E-06                       |                                                                                                                                                           | Regulates T cell and NK cell activation and proliferation             |
| <b>TNF-A</b>    | 1.58 [1.42-1.77]  | 2.67E-15                       | 8.00E-14                       | Positive<br>Nonpregnant women <sup>1,19</sup><br>Pregnant <sup>10</sup>                                                                                   | Acute phase protein/infection response                                |
| <b>SVEGFR1</b>  | 1.32 [1.18-1.48]  | 2.31E-06                       | 5.31E-05                       |                                                                                                                                                           | Inhibits lymphangiogenesis                                            |
| <b>SILRII</b>   | 1.31 [1.17-1.46]  | 5.62E-06                       | 1.24E-04                       |                                                                                                                                                           |                                                                       |
| <b>IP-10</b>    | 0.76 [0.68-0.85]  | 1.83E-06                       | 4.38E-05                       | Negative<br>Nonpregnant women <sup>8</sup><br>Pregnant white women <sup>15</sup><br>No Association<br>Nonpregnant women <sup>20</sup>                     | Anti-tumor chemoattractant                                            |
| <b>IL-10</b>    | 1.55 [1.38-1.74]  | 4.63E-13                       | 1.30E-11                       | Positive<br>Nonpregnant women <sup>21</sup>                                                                                                               | Immunosuppressive & anti-inflammatory cytokine                        |
| <b>SCD40L</b>   | 1.27 [1.14-1.43]  | 2.67E-05                       | 5.61E-04                       |                                                                                                                                                           | Induces pro-inflammatory tumorigenic cytokines/B cell activation      |
| <b>IL-2</b>     | 1.28 [1.14-1.43]  | 3.39E-05                       | 6.77E-04                       | Positive<br>Nonpregnant women <sup>21</sup>                                                                                                               | White blood cell regulator                                            |

\* Data for only the significantly associated immune markers is shown (after adjustment for multiple testing,  $q < 0.05$ , 15/32 tested markers). The full list of analyzed markers included: EGF, EOTAXIN, GRO, G-CSF, IFNA\_2, IFN\_G, IL\_10, IL\_15, IL\_1A, IL\_1B, IL\_1RA, IL\_2, IL\_6, IL\_7, IL\_8, IP\_10, MCP\_1, MIP\_1B, SCD40L, SEGFR, SGP130, SILRII, SIL\_4R, SIL\_6R, STNFRI, STNFRII, SVEGFR1, SVEGFR2, SVEGFR3, TGFA, TNF\_A and VEGF.

59

60

61 **Supplemental Table 3.** Beta Coefficients and Intercepts For Microbial Reference Frames Used  
62 to Calculate *molBV*

| Reference Frame                  | beta    | intercept |
|----------------------------------|---------|-----------|
| log(Lactobacillus/Prevotella)    | -1.0305 | 7.2775    |
| log(Lactobacillus/Gardnerella)   | -1.0012 | 6.7448    |
| log(Lactobacillus/Megasphaera)   | -1.6761 | 24.9232   |
| log(Lactobacillus/Parvimonas)    | -0.8007 | 10.2133   |
| log(Lactobacillus/Clostridium)   | -1.2528 | 10.0125   |
| log(Lactobacillus/Porphyromonas) | -0.8971 | 10.8979   |
| log(Lactobacillus/Adlercreutzia) | -1.0922 | 9.9193    |
| log(Lactobacillus/Dialister)     | -1.1281 | 9.6347    |
| log(Lactobacillus/Atopobium)     | -1.2970 | 9.8496    |
| log(Lactobacillus/Sneathia)      | -0.9494 | 8.3180    |

63

64

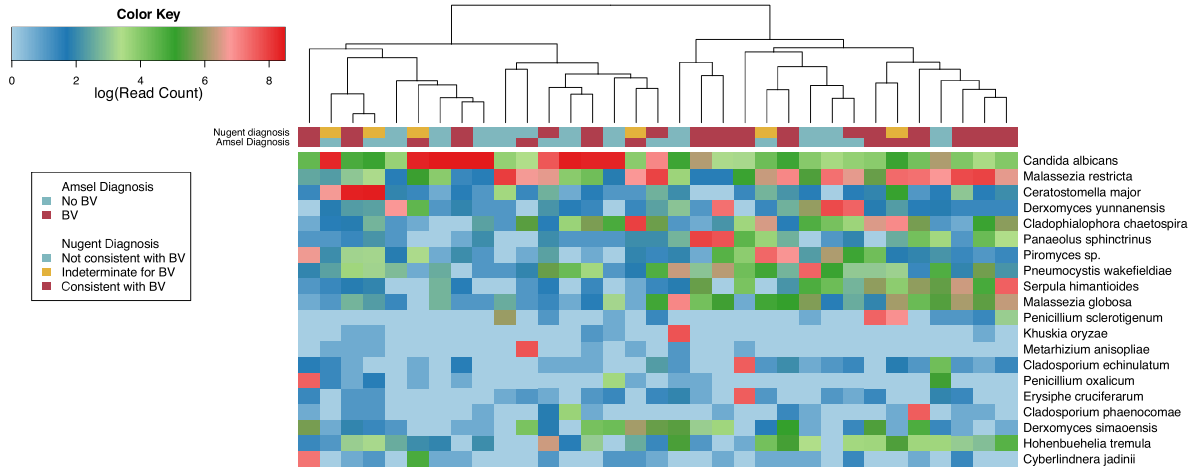

65 **Supplemental Figure 1. Heatmap Showing Clustering of the Cervicovaginal Microbiome**

66 **Based on the Top 20 Fungal Species.**

67 Heatmap shows the top 20 fungal species. The two rows directly below the dendrogram show the

68 sample case status based on Nugent and Amsel criteria in the first and second row, respectively.

69

70

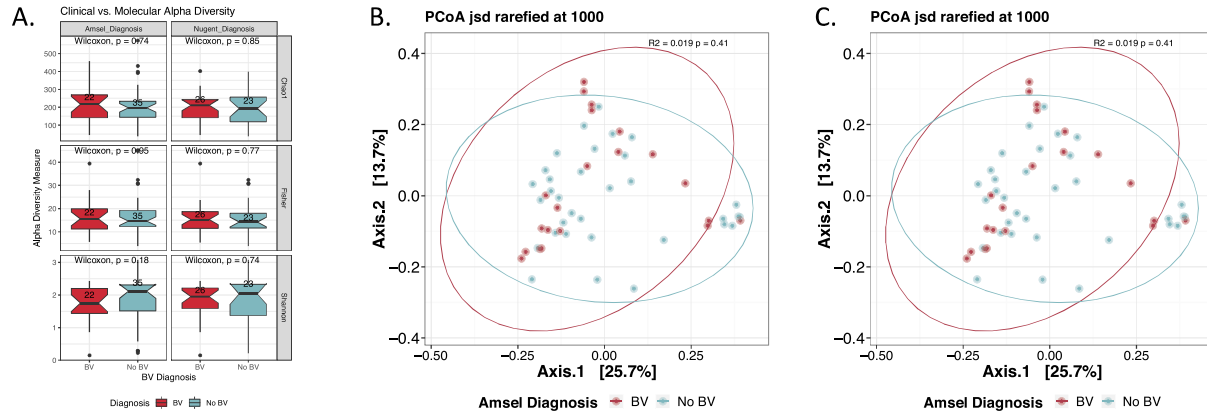

71  
 72 **Supplemental Figure 2. Alpha and Beta diversity Analysis of BV using Fungal NGS Data**  
 73 Panel A shows the alpha diversity differences of the Chao1, Fisher and Shannon diversity indices  
 74 for both BV diagnosed by Amsel or Nugent criteria (significance is shown in the figure). Panel B  
 75 shows beta diversity analysis using PCoA and Jensen Shannon Diversity index for the Amsel BV  
 76 diagnosis (not significant). Panel C shows beta diversity analysis using PCoA and Jensen  
 77 Shannon Diversity index for the Nugent BV diagnosis (not significant).

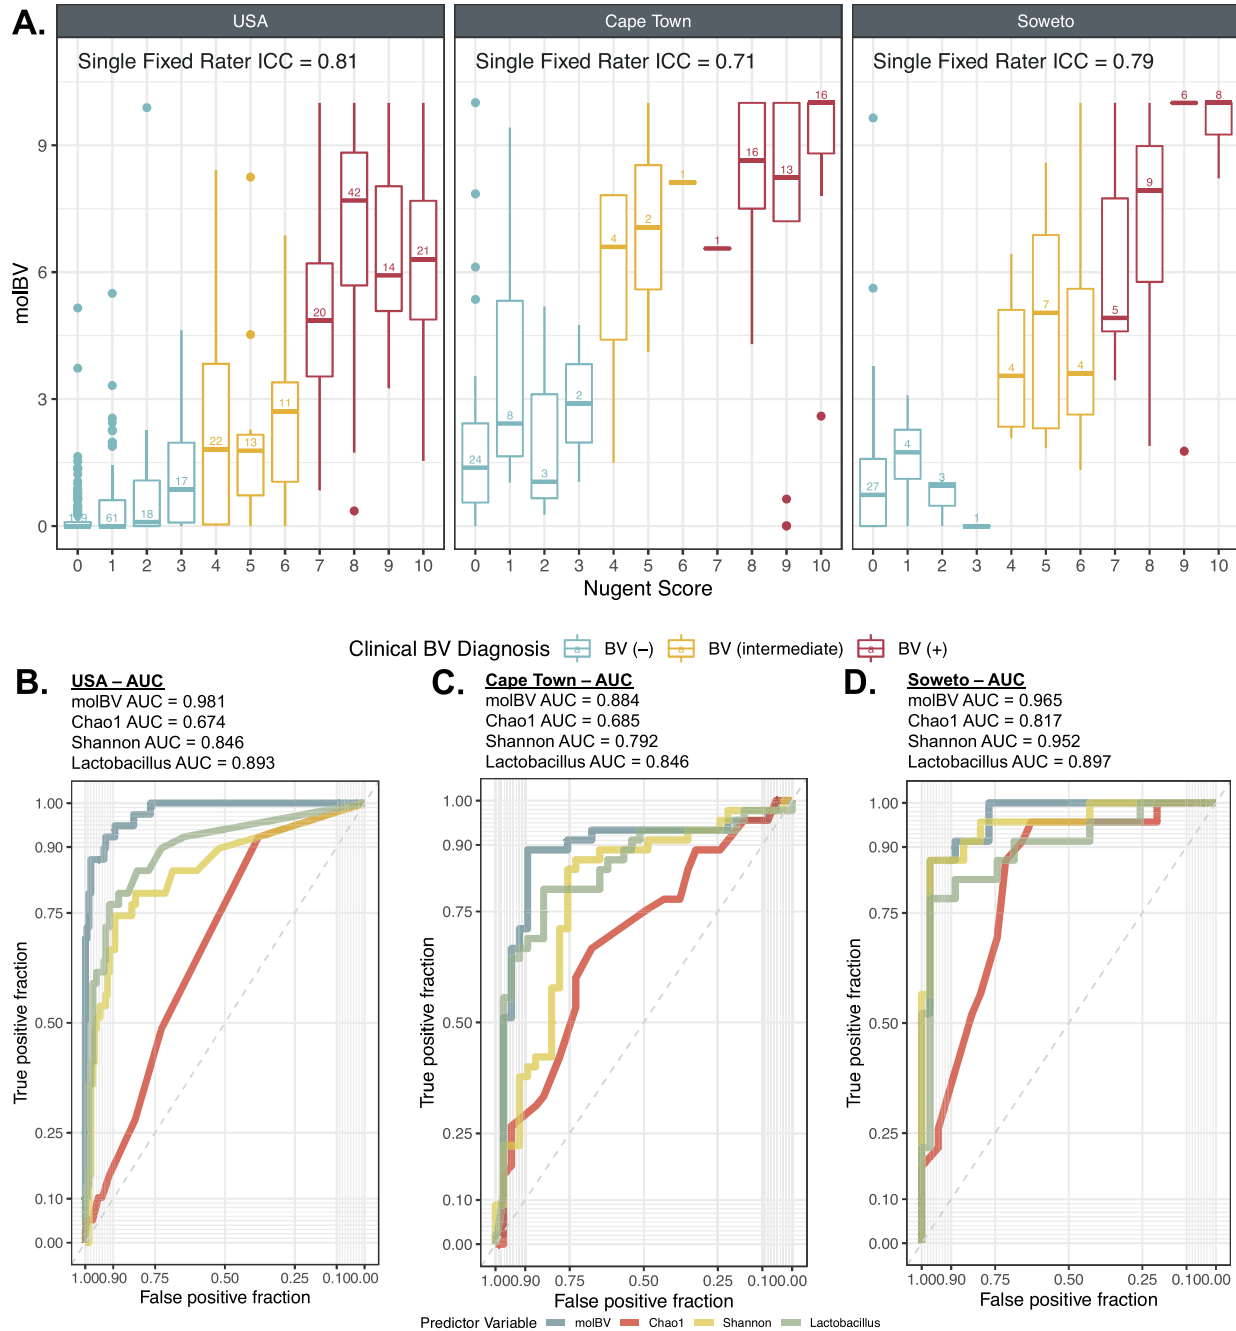

78

79 **Supplemental Figure 3. Benchmarking molecular diagnosis of BV vs. Clinical BV diagnosis**

80 A. The calculated molecular BV score (*molBV*) is shown on the y-axis vs. the clinical Nugent  
 81 score (x-axis) for each of the three tested cohorts (USA, Cape Town and Soweto). ICC was used  
 82 to assess the consistency between *molBV* and the Nugent Score and is shown in each of the  
 83 cohort panels. B., C. and D. show the AUC analyses the effectiveness of diagnosing BV using  
 84 *molBV* and three measured of the CVM (Chao1/Shannon alpha diversity and Lactobacillus  
 85 abundance) within the USA, Cape Town and Soweto cohorts respectively. In panels B-D each

86 line shown the AUC analyses for each components. Specific AUC values are provided above  
87 each cohort's figure.

88

89

90
